# Supplementary material for: Risk of Rapid Kidney Function Decline, All-Cause Mortality, and Major Cardiovascular Events in Nonalbuminuric Chronic Kidney Disease in Type 2 Diabetes
Source: Oxford University Press journal article supplement (doi:10.2337/dc19-1438), 2019-12-03
Supplement: dc191438supplementarydata.pdf [file dc191438supplementarydata.pdf]

SUPPLEMENTARY DATA

**Supplementary Figure S1.** Analysed populations from ACCORD cohort

Abbreviations: ACCORD, Action to Control Cardiovascular Risk in Diabetes, ACCORDION, Action to Control Cardiovascular Risk in Diabetes post-trial, UACR, urine albumin-creatinine ratio, eGFR, estimated glomerular filtration rate, ESKD, end-stage kidney disease

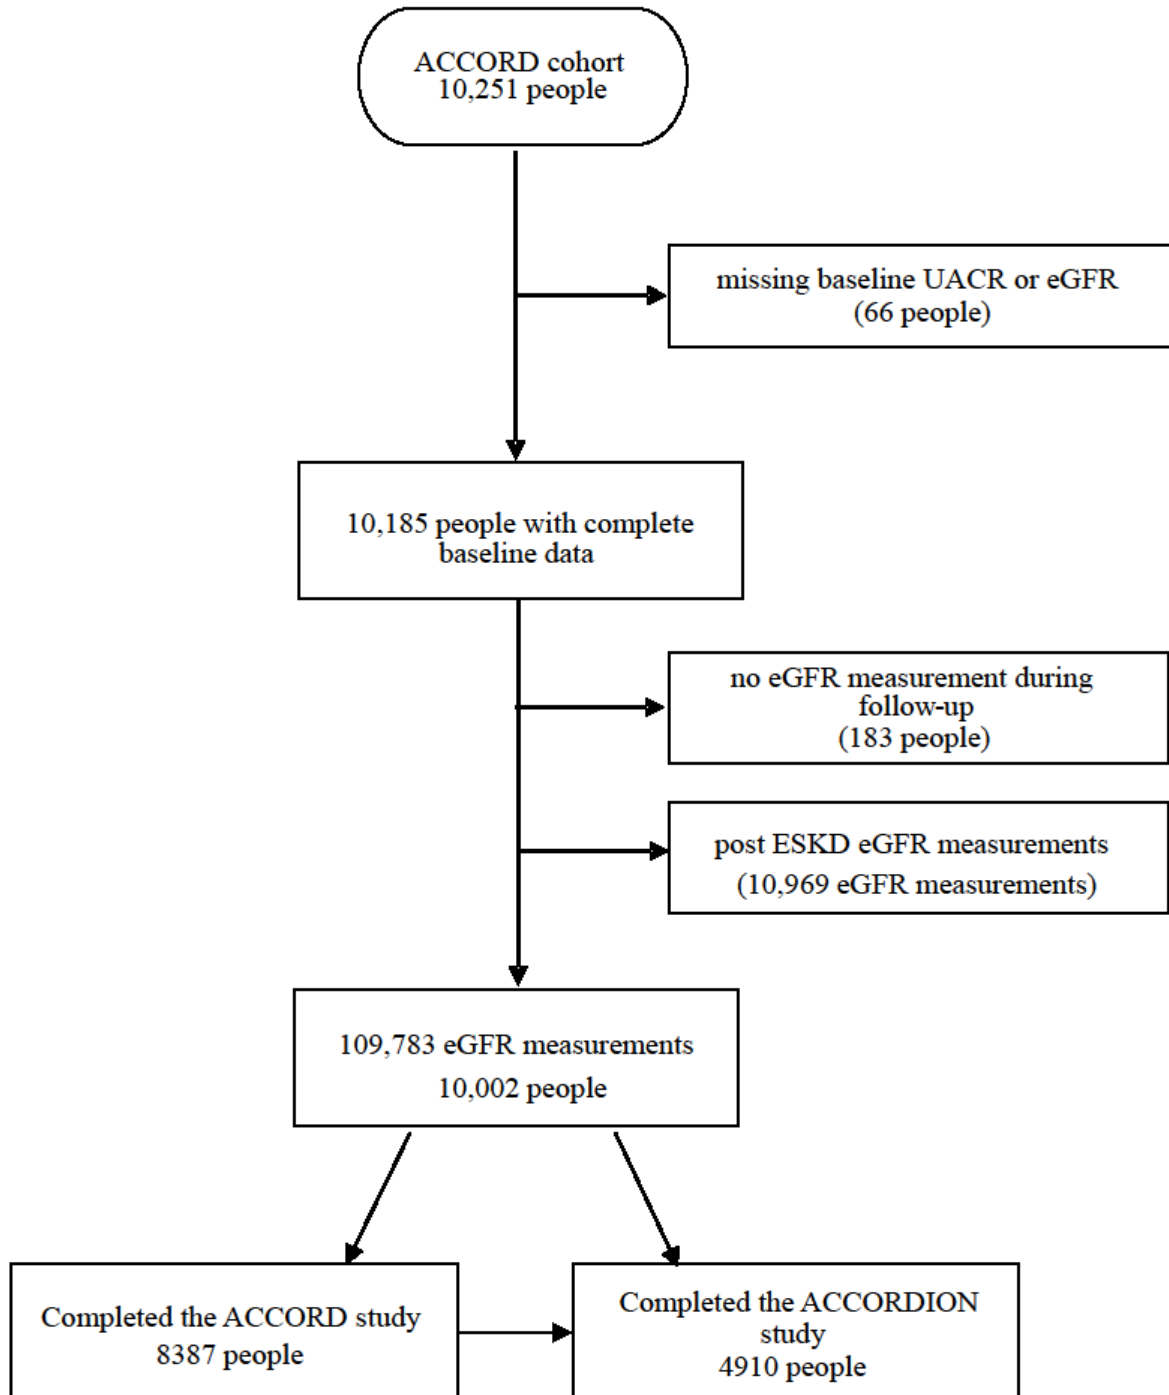

SUPPLEMENTARY DATA

**Supplementary Table S1.** Characteristics of study participants by CKD status at the end of ACCORD and ACCORDION study

|                                                 | Overall           | No CKD              |                  |                 | Albuminuric non-CKD | Albuminuric CKD  | Non-albuminuric CKD | p       |
|-------------------------------------------------|-------------------|---------------------|------------------|-----------------|---------------------|------------------|---------------------|---------|
|                                                 |                   | eGFR (≥120)         | eGFR (90-120)    | eGFR (60-90)    |                     |                  |                     |         |
| <b>ACCORD study end</b>                         |                   |                     |                  |                 |                     |                  |                     |         |
| n (%)*                                          | 8387 (100)        | 653 (7.8)           | 2319 (27.6)      | 2565 (30.6)     | 2266 (27)           | 243 (2.9)        | 341 (4.1)           |         |
| Follow-up duration (yr; median [IQR])           | 5.0 (4.3, 5.7)    | 5.1 (4.3, 5.9)      | 5.0 (4.2, 5.6)   | 5.05 (4.3, 5.7) | 5.0 (4.3, 5.7)      | 5.0 (4.2, 5.9)   | 5.2 (4.3, 5.9)      | 0.0001  |
| Past smoker (n [%])                             | 3793 (45.2)       | 280 (42.9)          | 1011 (43.6)      | 1196 (46.6)     | 1088 (48)           | 85 (35)          | 133 (39)            | <0.0001 |
| Never smoked (n [%])                            | 2420 (28.8)       | 199 (30.5)          | 669 (28.8)       | 772 (30.1)      | 551 (24.3)          | 94 (38.6)        | 135 (39.6)          |         |
| HbA1c (%; mean [SD])                            | 7.5 (1.0)         | 7.6 (1.2)           | 7.6 (1.2)        | 7.5 (1.1)       | 7.7 (1.2)           | 7.4 (1.0)        | 7.5 (1.0)           | <0.0001 |
| HbA1c (mmol/mol; mean [SD])                     | 59.4 (13.1)       | 59.4 (14.1)         | 59.7 (13.2)      | 58.3 (12)       | 60.6 (14.1)         | 57.2 (10.8)      | 58.2 (11.1)         | <0.0001 |
| Triglycerides (mg/dl; median [IQR])             | 133 (94, 194)     | 129 (92, 190)       | 126 (88, 189)    | 130 (92, 188)   | 143 (100, 208)      | 140 (103, 198)   | 142 (105, 205)      | <0.0001 |
| Total cholesterol (mg/dl; median [IQR])         | 156 (135, 184)    | 155 (135, 188)      | 157 (136, 184)   | 154 (133, 181)  | 157 (134, 187)      | 156 (134, 179)   | 158 (139, 182)      | 0.04    |
| HDL cholesterol (mg/dl; median [IQR])           | 42 (35, 50)       | 43 (36, 50)         | 43 (36, 51)      | 42 (36, 51)     | 40 (34, 49)         | 41 (33, 48)      | 42 (35, 51)         | <0.0001 |
| Systolic BP (mmHg; mean [SD])                   | 128.7 (17.0)      | 126.8 (15.8)        | 127.8 (15.9)     | 128 (15.6)      | 131.6 (17.8)        | 136.6 (19.7)     | 128.4 (17)          | <0.0001 |
| Diastolic BP (mmHg; mean [SD])                  | 67.9 (10.2)       | 69 (9.7)            | 69.2 (9.6)       | 67.5 (10.1)     | 67.3 (10.7)         | 65.6 (10.6)      | 65.9 (10.4)         | <0.0001 |
| RAAS blockade (n [%])                           | 6389 (76.1)       | 462 (70.7)          | 1738 (74.9)      | 1925 (75)       | 1810 (79.9)         | 184 (75.7)       | 270 (79.2)          | <0.0001 |
| UACR (mg/mmol; median [IQR])                    | 1.4 (0.67, 5.6)   | 1.1 (0.67, 2.1)     | 1 (0.56, 1.8)    | 0.9 (0.56, 2.3) | 7.8 (2.2, 27.8)     | 16.3 (4.1, 64.7) | 1.7 (0.9, 4.6)      | 0.0001  |
| UACR (mg/g; median [IQR])                       | 13 (6, 50)        | 10 (6, 19)          | 8 (5, 16)        | 9 (5, 21)       | 69 (20, 246)        | 145 (37, 573)    | 15 (8, 41)          | 0.001   |
| eGFR (ml/min/1.73m <sup>2</sup> ; median [IQR]) | 75.7 (59.7, 92.5) | 105.3 (88.8, 120.5) | 87.7 (74.7, 100) | 70 (58.1, 81.1) | 71.4 (56, 89.1)     | 42 (34.4, 49.7)  | 49.9 (42.2, 58.1)   | 0.0001  |
| <b>ACCORDION study end</b>                      |                   |                     |                  |                 |                     |                  |                     |         |
| n (%)*                                          | 4910 (100)        | 401 (8.2)           | 1450 (31.5)      | 1545 (29.5)     | 1203 (24.5)         | 122 (2.5)        | 189 (3.8)           |         |
| Follow-up duration (yr; median [IQR])           | 9.6 (8.5, 10.7)   | 9.8 (8.7, 10.8)     | 9.5 (8.5, 10.5)  | 9.7 (8.6, 10.6) | 9.4 (8.3, 10.6)     | 9.3 (7.9, 10.5)  | 9.7 (8.5, 10.7)     | 0.0003  |
| HbA1c (%; mean [SD])                            | 7.9 (1.4)         | 7.9 (1.5)           | 8.0 (1.5)        | 7.7 (1.4)       | 7.9 (1.5)           | 7.7 (1.2)        | 7.8 (1.3)           | <0.0001 |
| HbA1c (mmol/mol; mean [SD])                     | 62.7 (16.3)       | 63.1 (17.1)         | 63.8 (16.9)      | 61.2 (15.3)     | 63.4 (17)           | 60.7 (13.8)      | 62.5 (14.4)         | <0.0001 |

SUPPLEMENTARY DATA

|                                                 |                   |                 |                   |                 |                   |                   |                   |         |
|-------------------------------------------------|-------------------|-----------------|-------------------|-----------------|-------------------|-------------------|-------------------|---------|
| Triglycerides (mg/dl; median [IQR])             | 131 (93, 188)     | 125 (88, 185)   | 127 (91, 177)     | 130 (93, 188)   | 137 (95, 201)     | 133 (99.5, 193)   | 148 (96, 206)     | <0.0001 |
| HDL cholesterol (mg/dl; median [IQR])           | 41 (34, 50)       | 43 (36, 51)     | 42 (35, 51)       | 42 (34, 51)     | 40 (33, 49)       | 39 (32, 48.5)     | 41 (34, 51)       | 0.0001  |
| Systolic BP (mmHg; mean [SD])                   | 132.2 (17.9)      | 132 (17.1)      | 130.8 (17.1)      | 131.9 (17.3)    | 133.9 (19.4)      | 137.4 (17.9)      | 132.2 (18.8)      | <0.0001 |
| Diastolic BP (mmHg; mean [SD])                  | 67.9 (10.5)       | 70 (10.7)       | 68.7 (10)         | 67.2 (10.4)     | 67.6 (10.7)       | 64.8 (10.5)       | 66.5 (11)         | <0.0001 |
| RAAS blockade (n [%])                           | 3282 (66.8)       | 254 (63.3)      | 996 (68.7)        | 1027 (66.4)     | 804 (66.8)        | 70 (57.4)         | 131 (69.3)        | 0.07    |
| UACR (mg/mmol; median [IQR])                    | 2.25 (0.9, 10)    | 1.3 (0.8, 3.6)  | 1.3 (0.67, 3.2)   | 1.7 (0.8, 4.9)  | 12.9 (3.0, 58.6)  | 18.8 (4.8, 70.4)  | 3.1 (1.2, 12.3)   | 0.0001  |
| UACR (mg/g; median [IQR])                       | 20 (8, 109)       | 12 (7, 32)      | 12 (6, 29)        | 15 (7, 44)      | 115 (27, 519)     | 167 (43, 623.5)   | 28 (11, 109)      | 0.0001  |
| eGFR (ml/min/1.73m <sup>2</sup> ; median [IQR]) | 72.9 (56.2, 90.6) | 103 (81, 118.2) | 85.1 (69.9, 98.8) | 67.2 (55.3, 80) | 67.7 (50.1, 85.2) | 37.4 (30.1, 48.6) | 50.3 (41.8, 57.7) | 0.0001  |

Abbreviations: ACCORD, Action to Control Cardiovascular Risk in Diabetes, ACCORDION, Action to Control Cardiovascular Risk in Diabetes post-trial, CKD, chronic kidney disease; eGFR, estimated glomerular filtration rate; yr, year; IQR, interquartile range; HbA1c, glycated hemoglobin; HDL cholesterol, high-density lipoprotein cholesterol; RAAS blockade, renin-angiotensin-aldosterone system blockade; UACR, urine albumin-creatinine ratio.

\* Number of people screened for all tests including kidney function, lipids, hba1c and blood pressure etc.
